# Supplementary material for: A polysaccharide from Lentinus edodes inhibits human colon cancer cell proliferation and suppresses tumor growth in athymic nude mice
Source: PubMed Central journal article supplement (PMC5352182; doi:10.18632/oncotarget.13481), 2016-11-21
Supplement: oncotarget-08-610-s001.pdf [file oncotarget-08-610-s001.pdf]

## A polysaccharide from *Lentinus edodes* inhibits human colon cancer cell proliferation and suppresses tumor growth in athymic nude mice

### Supplementary Materials

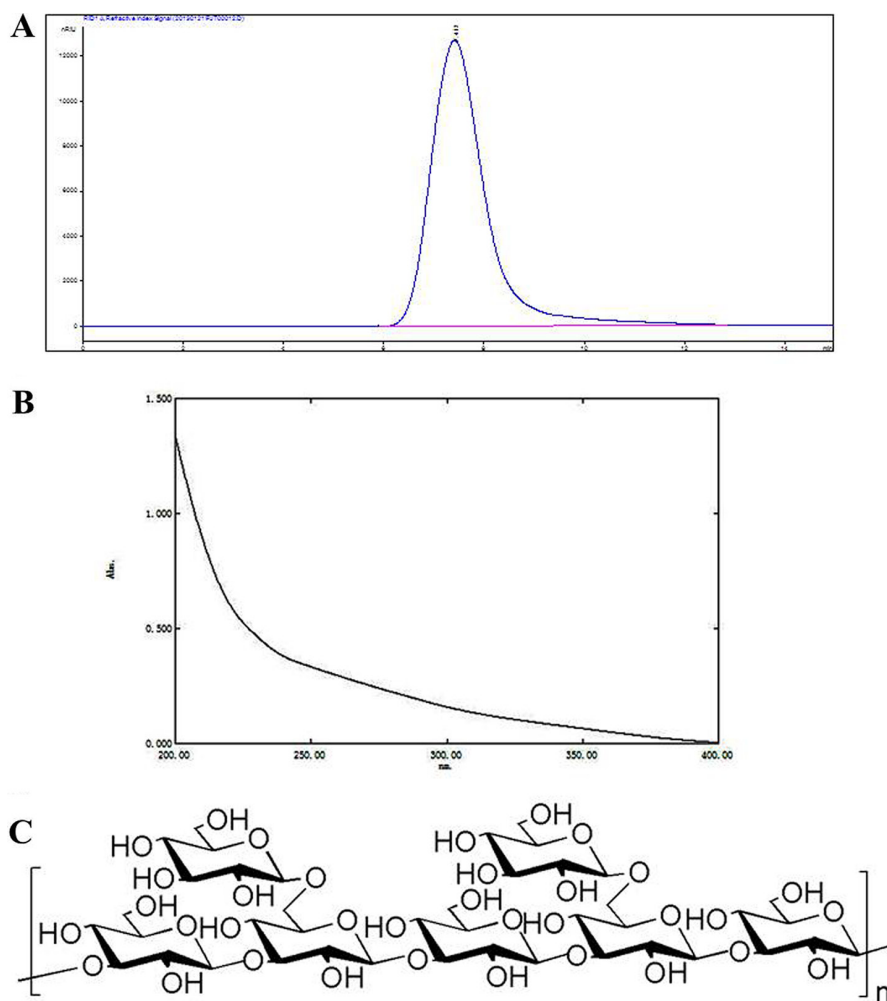

**Supplementary Figure S1:** The weight-average molecular weight of SLNT was 623.5 kDa, determined by HPGPC (A). No absorption at either 280 or 260 nm by UV spectrum, revealing the absence of protein and nucleic acid (B). The basic structural unit of SLNT (C).
